# Supplementary material
Source: Springer Nature journal article supplement (https://www.springermedizin.de/resource/supplementary/12891_2012_1737_MOESM2_ESM.pdf/9508452)

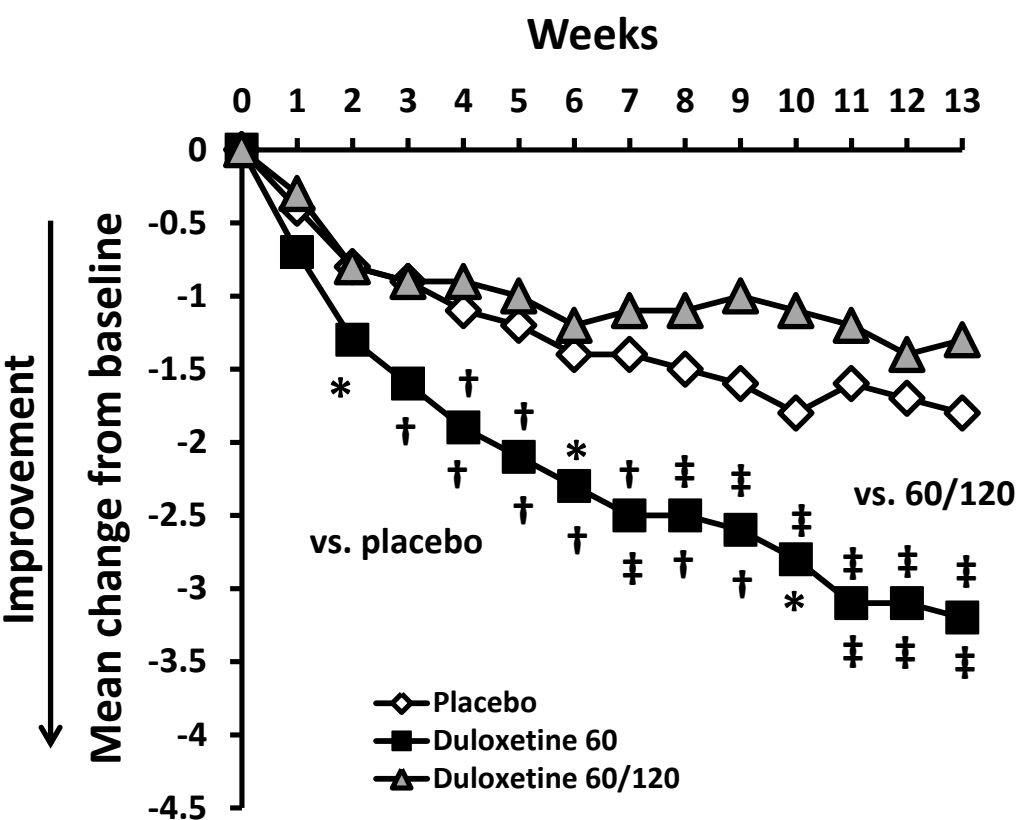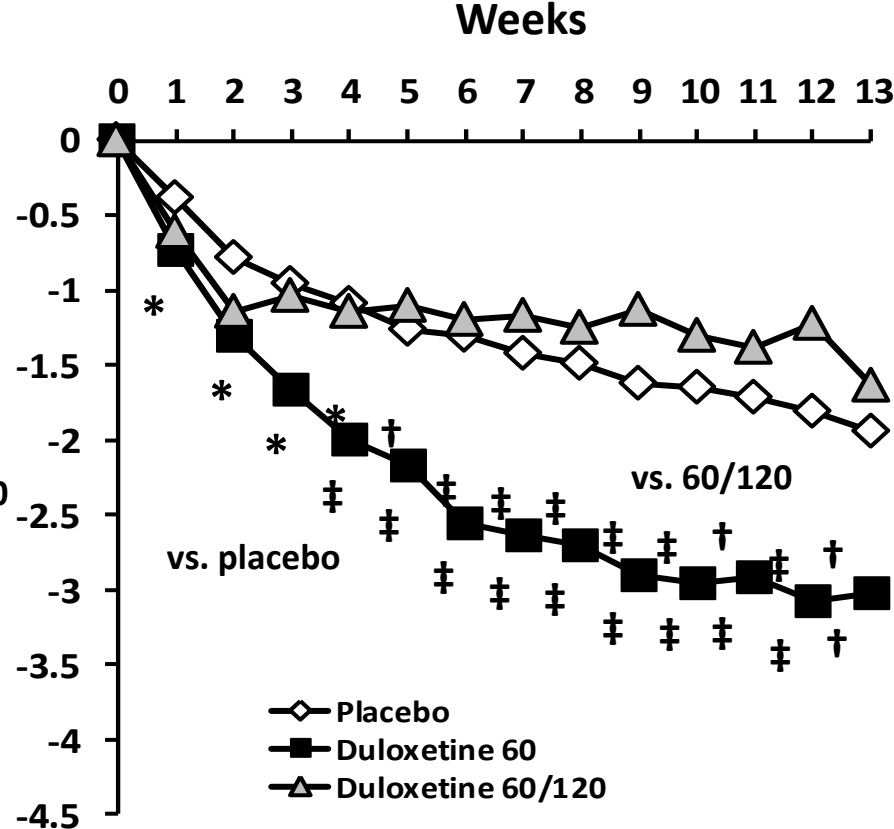

Older patients

\*  $p \leq .05$ , †  $p \leq .01$ , ‡  $p \leq .001$

Younger patients

Week-by-treatment-by-age group interaction,  $p = .39$

Supplement: MOESM2 [file 9508452]
